# Supplementary material for: Radiofluorination of diaryliodonium tosylates under aqueous–organic and cryptand-free conditions
Source: Royal Society of Chemistry journal article supplement (doi:10.1039/c3ob40742j), 2013-01-01

## Electronic Supplementary Information

### Radiofluorination of diaryliodonium tosylates under aqueous-organic and cryptand-free conditions

**Joong-Hyun Chun, Sanjay Telu, Shuiyu Lu\* and Victor W. Pike**

Molecular Imaging Branch, National Institute of Mental Health, National Institutes of Health,  
Rm. B3 C346, 10 Center Drive, Bethesda MD 20892-1003, USA.

E-mail: Shuiyu.lu@mail.nih.gov; Fax: +1 301 480 5112; Tel: +1 301 451 3904.

|                                                                                       |                                                       |     |
|---------------------------------------------------------------------------------------|-------------------------------------------------------|-----|
| 1                                                                                     | Materials                                             | S2  |
| 2                                                                                     | General methods                                       | S2  |
| 3                                                                                     | Syntheses of reagents for making diaryliodonium salts | S3  |
| 4                                                                                     | Syntheses of diaryliodonium salts                     | S4  |
| <br><b>Appendix 1.</b> $^1\text{H}$ , $^{19}\text{F}$ and $^{13}\text{C}$ NMR spectra |                                                       | S9  |
| <b>Appendix 2.</b> Selected radio-HPLC chromatograms                                  |                                                       | S18 |
| <b>Appendix 3.</b> Configuration of the microfluidic apparatus                        |                                                       | S20 |

## Experimental

### 1 Materials

DMF (99%, anhydrous), water (HPLC grade), K<sub>2</sub>CO<sub>3</sub> (99%), K 2.2.2 (4,7,13,16,21,24-hexaoxa-1,10-diazabicyclo[8.8.8]hexacosane), Koser's reagent, 4-anisole, 4-iodobiphenyl, diphenyliodonium tosylate (**1**) and reference fluoroarenes were purchased from either Sigma-Aldrich (Milwaukee, WI) or Alfa Aesar (Ward Hill, MA). 4-Bromo-4'-iodobenzophenone was obtained from Rieke Metals, Inc. (Lincoln, NE). The following diaryliodonium tosylates were prepared as described previously: (2-methylphenyl)(phenyl)iodonium tosylate (**2**) [1], (2-bromophenyl)(phenyl)iodonium tosylate (**3**) [1], (3-ethoxycarbonylphenyl)(4'-methoxyphenyl)iodonium tosylate (**9**) [2], (4-methoxyphenyl)[3'-(trifluoromethyl)phenyl]iodonium tosylate (**10**) [3], (4-methoxyphenyl)(3'-nitrophenyl)iodonium tosylate (**11**) [3], and (3-cyanophenyl)(4'-methoxyphenyl)iodonium tosylate (**13**) [3].

### 2 General methods

<sup>1</sup>H (400 MHz), <sup>13</sup>C (100 MHz), and <sup>19</sup>F (376 MHz) NMR spectra were recorded at room temperature on an Avance-400 spectrometer (Bruker; Billerica, MA). <sup>1</sup>H and <sup>13</sup>C chemical shifts are reported in  $\delta$  units downfield from the chemical shift for tetramethylsilane and <sup>19</sup>F NMR chemical shifts in  $\delta$  units downfield from the chemical shift for CFC<sub>l</sub><sub>3</sub>. Abbreviations br, s, d, t, and m denote broad, singlet, doublet, triplet and multiplet, respectively.

High resolution mass spectra (HRMS) were obtained from the Mass Spectrometry Laboratory, University of Illinois at Urbana-Champaign (Urbana, IL) under electron ionization conditions using a double-focusing high-resolution mass spectrometer (Autospec; Micromass Inc., USA). Melting points were measured with a Mel-Temp melting point apparatus (Electrothermal; Fisher Scientific).

### 3 Syntheses of reagents for making diaryliodonium salts

#### 3.1 4-Cyano(diacetoxyiodo)benzene (**A**)

Peracetic acid in acetic acid (32 wt.%, 10 mL) was added drop-wise to cooled ( $\sim 0\text{ }^{\circ}\text{C}$ ) 4-iodobenzonitrile (1.15 g, 5 mmol). The temperature was gradually raised to rt and the reaction mixture was stirred overnight (*ca.* 14 h) to give a white precipitate. Water (20 mL) was added to the mixture and the resultant solid was filtered off, washed with Et<sub>2</sub>O (30 mL  $\times$  3), and dried *in vacuo* for 4 h to give **A** as a white solid (1.12 g, 65%); mp 171–173  $^{\circ}\text{C}$ ; <sup>1</sup>H-NMR (CDCl<sub>3</sub>)  $\delta$  8.21 (2 H, d,  $J$  = 8.8 Hz, ArH), 7.78 (2 H, d,  $J$  = 8.8 Hz, ArH), 2.03 (6 H, s, Me); <sup>13</sup>C-NMR (CDCl<sub>3</sub>)  $\delta$  176.9, 135.8, 134.3, 125.4, 117.3, 115.9, 20.6.

#### 3.2 1-Cyano-4-[hydroxy(tosyloxy)iodo]benzene (**B**)

**A** (1.04 g, 3 mmol) in MeCN (20 mL) was added in one portion to a heated ( $\sim 60\text{ }^{\circ}\text{C}$ ) bright yellow solution of *p*-TsOH·H<sub>2</sub>O (0.63 g, 3.3 mmol). The reaction mixture was cooled to rt. The precipitate was filtered off and washed with Et<sub>2</sub>O (30 mL  $\times$  3) to give **B** as a white solid (0.95 g, 76%); mp 138–139  $^{\circ}\text{C}$ ; <sup>1</sup>H-NMR (DMSO-*d*<sub>6</sub>)  $\delta$  10.04 (1 H, br s, OH), 8.34 (2 H, d,  $J$  = 7.6 Hz, ArH), 8.07 (2 H, d,  $J$  = 7.6 Hz, ArH), 7.47 (2 H, d,  $J$  = 7.6 Hz, ArH), 7.12 (2 H, d,  $J$  = 7.6 Hz, ArH), 2.29 (3 H, s, Me); <sup>13</sup>C-NMR (DMSO-*d*<sub>6</sub>)  $\delta$  145.3, 137.9, 134.6, 134.5, 128.2, 125.5, 117.6, 114.6, 20.8.

#### 3.3 1-Fluoro-4-[hydroxy(tosyloxy)iodo]benzene (**C**)

*m*-Chloroperbenzoic acid (*m*-CPBA; 77% max.; 1.73 g, 7.7 mmol) was added portion-wise to a solution of 4-fluoriodobenzene (1.55 g, 7 mmol) in CHCl<sub>3</sub> (30 mL). *p*-TsOH·H<sub>2</sub>O (1.47 g, 7.7 mmol) was added to the pale yellow solution and the temperature was raised to 40  $^{\circ}\text{C}$ . The reaction mixture was stirred for 1 h and then cooled to rt. The resultant precipitate was filtered off, washed with Et<sub>2</sub>O (50 mL  $\times$  3), and dried *in vacuo* for 6

h to give **C** as a white solid (1.96 g, 68%); mp 145–146 °C;  $^1\text{H-NMR}$  ( $\text{DMSO-}d_6$ )  $\delta$  9.89 (1 H, br s, OH), 8.29 (2 H, dt,  $J = 1.6, 3.6$  Hz, ArH), 7.50–7.45 (4 H, m, ArH), 7.12 (2 H, d,  $J = 8$  Hz, ArH), 2.29 (s, 3H, Me);  $^{19}\text{F-NMR}$  ( $\text{DMSO-}d_6$ )  $\delta$  –105.86.

#### 3.4 4-(Diacetoxiodo)biphenyl (**D**)

Peracetic acid (32 wt.% diluted in acetic acid, 12 mL) was added drop-wise to a mixture of 4-iodobiphenyl (1.96 g, 7 mmol) in acetic acid (5 mL). The reaction was gradually heated to 50 °C and stirred for 5 h. Consumption of 4-iodobiphenyl was monitored with TLC. The yellow solution was cooled to rt and water (30 mL) was added. The aqueous phase was extracted with  $\text{CH}_2\text{Cl}_2$  (30 mL  $\times$  2), dried over  $\text{MgSO}_4$ , and concentrated under reduced pressure. The resulting oil was triturated with  $\text{Et}_2\text{O}$  and then the solid was filtered off and recrystallized from acetic acid to give **D** as a pale yellow solid (0.62 g, 22%); mp 155–159 °C;  $^1\text{H-NMR}$  ( $\text{CDCl}_3$ )  $\delta$  7.86 (2 H, d,  $J = 8.4$  Hz, ArH), 7.45 (2 H, d,  $J = 8.4$  Hz, ArH), 7.55–7.51 (5 H, m, Ph), 1.94 (6 H, s, Me);  $^{13}\text{C-NMR}$  ( $\text{CDCl}_3$ )  $\delta$  175.6, 142.0, 133.2, 131.6, 127.4, 126.8, 126.2, 125.1, 124.9, 120.1, 19.2.

### 4. Syntheses of diaryliodonium salts

#### 4.1 (2-Cyanophenyl)(4'-methoxyphenyl)iodonium tosylate (**4**).

*m*-CPBA (0.49 g, 2.3 mmol, 77% max. content) was added to a solution of 2-iodobenzonitrile (0.46 g, 2 mmol) in  $\text{CH}_2\text{Cl}_2$  (10 mL) and the mixture was stirred for 15 min. *p*-TsOH· $\text{H}_2\text{O}$  (0.38 g, 2.0 mmol) was added to the colorless solution and the resulting pale yellow solution was stirred for 10 min. Anisole (0.33 g, 3 mmol) was then added and the resulting mixture was stirred for 14 h. Solvent was removed *in vacuo* and the crude product was sonicated for 5 min in  $\text{Et}_2\text{O}$  (25 mL).  $\text{Et}_2\text{O}$  was decanted off and the residual solid was washed with water to remove tosic acid and then dissolved in MeCN.  $\text{Et}_2\text{O}$  was added

slowly to precipitate **4** slowly (~15 min) as a white solid (0.68 g, 67%); mp 173–176 °C (decomp.); <sup>1</sup>H-NMR (DMSO-*d*<sub>6</sub>) δ 8.67–8.59 (1 H, m, ArH), 8.19–8.11 (3 H, m, ArH), 7.90–7.83 (2 H, m, ArH), 7.46 (2 H, d, *J* = 8.0 Hz, ArH), 7.11 (4 H, overlapping doublets, ArH), 3.80 (3 H, s, OMe), 2.29 (3 H, s, Me); <sup>13</sup>C-NMR (DMSO-*d*<sub>6</sub>) δ 162.2, 145.6, 137.7, 137.2, 136.3, 135.4, 132.9, 128.1, 125.5, 120.7, 118.0, 117.8, 116.4, 106.3, 91.7, 55.8, 20.8; LC-MS (ESI, *m/z*) [M-OTs]<sup>+</sup> Calc'd. for C<sub>14</sub>H<sub>11</sub>ONI: 335.99, Found: 336.10. HRMS [M-OTs]<sup>+</sup> Calc'd. for C<sub>14</sub>H<sub>11</sub>OIN: 335.9885, Found: 335.9881.

#### 4.2 (4-Methoxycarbonylphenyl)(4'-methoxyphenyl)iodonium tosylate (**5**).

The method described for **4** was used with methyl-4-iodobenzoate (0.53 g, 2 mmol). The process gave crude product (0.72 g) that contained about 10% tosic acid and 10% unreacted methyl-4-iodobenzoate. A portion (0.15 g) of this material was washed with water to remove tosic acid. Then the solid was dissolved in CH<sub>2</sub>Cl<sub>2</sub> (0.5 mL). Diethyl ether was added slowly to precipitate **5** as white solid (80 mg, 36%). mp 179–181 °C; <sup>1</sup>H-NMR (CDCl<sub>3</sub>) δ 7.97 (d, *J* = 8.4 Hz, 2H, ArH), 7.90–7.86 (m, 4H, ArH), 7.47 (d, *J* = 8 Hz, 2H, ArH), 7.01 (d, *J* = 8.0 Hz, 2H, ArH), 6.83 (d, *J* = 8.8 Hz, 2H, ArH), 3.91 (s, 3H, OCH<sub>3</sub>), 3.79 (s, 3H, OCH<sub>3</sub>), 2.31 (s, 3H, CH<sub>3</sub>); <sup>13</sup>C-NMR (CDCl<sub>3</sub>) δ 165.2, 162.1, 145.7, 137.6, 137.5, 135.1, 132.4, 131.8, 128.1, 125.5, 121.8, 117.6, 105.5, 55.8, 52.7, 20.8; LC-MS (ESI, *m/z*) [M-OTs]<sup>+</sup> Calc'd. for C<sub>15</sub>H<sub>14</sub>O<sub>3</sub>I: 369.00, Found: 368.90. HRMS [M-OTs]<sup>+</sup> Calc'd. for C<sub>15</sub>H<sub>14</sub>O<sub>3</sub>I: 368.9988, Found: 368.9991.

#### 4.3 (4-Cyanophenyl)(4'-methoxyphenyl)iodonium tosylate (**6**).

Anisole (0.7 g, 6.4 mmol) was added to a suspension of **B** (0.13 g, 0.3 mmol) in CHCl<sub>3</sub> (7 mL). The reaction mixture was then refluxed for 5 h. The obtained light brown solution was concentrated under reduced pressure and the residual light brown oil was triturated with Et<sub>2</sub>O. The solid was filtered off, and washed with Et<sub>2</sub>O/hexane to give **6** as a

beige solid (0.12 g, 80%). mp 188–191 °C;  $^1\text{H-NMR}$  ( $\text{DMSO-}d_6$ )  $\delta$  8.36 (2 H, d,  $J = 8.4$  Hz, ArH), 8.21 (2 H, d,  $J = 8.4$  Hz, ArH), 7.98 (2 H, d,  $J = 8.4$  Hz, ArH), 7.47 (2 H, d,  $J = 8$  Hz, ArH), 7.12–7.07 (4 H, m, ArH), 3.80 (3 H, s, OMe), 2.28 (3 H, s, Me);  $^{13}\text{C-NMR}$  ( $\text{DMSO-}d_6$ )  $\delta$  162.2, 145.7, 137.7, 137.3, 135.4, 134.9, 128.1, 125.5, 121.9, 117.6, 114.4, 105.6, 55.8, 20.8. HRMS  $[\text{M-OTs}]^+$  Calc'd. for  $\text{C}_{14}\text{H}_{11}\text{OIN}$ : 335.9885, Found: 335.9876.

#### 4.4 (2-Methylphenyl)(4'-methoxyphenyl)iodonium tosylate (7).

The method described for **4** was used with iodotoluene (0.53 g, 2 mmol) to give **7** as a white solid (0.43 g, 43%). mp 157–159 °C;  $^1\text{H-NMR}$  ( $\text{CDCl}_3$ )  $\delta$  8.01 (1 H, dd,  $J = 8.0$  and 1.2 Hz, ArH), 7.79 (2 H, d,  $J = 9.2$  Hz, ArH), 7.54 (2 H, d,  $J = 8.0$  Hz, ArH), 7.46 (1 H, dt,  $J = 7.6$  and 0.8 Hz, ArH), 7.37 (1 H, dd,  $J = 7.6$  and 0.8 Hz, ArH), 7.17 (1 H, dt,  $J = 8.0$  and 1.2 Hz, ArH), 7.04 (2 H, d,  $J = 8.0$  Hz, ArH), 6.85 (2 H, d,  $J = 9.2$  Hz, ArH), 3.76 (3 H, s, OMe), 2.55 (3 H, s, Me), 2.30 (3 H, s, Me);  $^{13}\text{C-NMR}$  ( $\text{CDCl}_3$ )  $\delta$  162.0, 142.8, 141.1, 139.1, 137.3, 136.5, 132.5, 131.4, 129.1, 128.4, 126.0, 120.8, 117.3, 103.3, 55.6, 25.6, 21.3; LCMS (ESI,  $m/z$ )  $[\text{M-OTs}]^+$  Calc'd. for  $\text{C}_{14}\text{H}_{14}\text{OI}$ : 325.01, Found: 324.90. HRMS  $[\text{M-OTs}]^+$  Calc'd. for  $\text{C}_{14}\text{H}_{14}\text{OI}$ : 325.0089, Found: 325.0089

#### 4.5 (4-(4''-Bromophenylcarbonyl)phenyl)(4'-methoxyphenyl) tosylate (8).

*m*-CPBA (0.26 g, 1.5 mmol, 77% max. content) was added in portions to a solution of 4-bromo-4'-iodobenzophenone (0.58 g, 1.5 mmol) in  $\text{CHCl}_3$  (20 mL). The mixture was stirred until it became a pale yellow solution (~ 15 min). *p*-TsOH·H<sub>2</sub>O (0.29 g, 1.5 mmol) was added, followed by anisole (1.08 g, 10 mmol). The resulting mixture was gradually heated to 40 °C and held at this temperature for about 2 h while the mixture became a yellow solution. Full consumption of the *in situ* generated [hydroxy(tosyl)iodo]arene was verified with KI starch paper. Reaction solvent was then removed *in vacuo* and the residual yellow oil was triturated with Et<sub>2</sub>O. The generated solid was washed with Et<sub>2</sub>O and recrystallized

from MeOH-Et<sub>2</sub>O to give **8** as a white solid (0.53 g, 53%). mp = 165–167 °C; <sup>1</sup>H-NMR (MeOD-*d*<sub>4</sub>) δ 8.19 (4 H, dd, *J* = 8.4, 28.4 Hz, ArH), 7.81 (2 H, d, *J* = 8.4 Hz, ArH), 7.72–7.65 (6 H, m, ArH), 7.21 (2 H, d, *J* = 7.6 Hz, ArH), 7.08 (2 H, d, *J* = 8.8 Hz, ArH), 3.85 (3 H s, OMe), 2.35 (3 H, s, Me); <sup>13</sup>C-NMR (MeOD-*d*<sub>4</sub>) δ 195.5, 164.9, 143.8, 141.9, 141.8, 139.1, 136.7, 136.2, 133.7, 133.3, 133.0, 130.0, 129.6, 127.2, 120.4, 119.2, 104.6, 56.5, 21.5; HRMS [M–OTs]<sup>+</sup> Calc'd. for C<sub>20</sub>H<sub>15</sub>O<sub>2</sub>BrI: 492.9300, Found: 492.9298.

#### 4.6 (4-Biphenyl)(4'-methoxyphenyl)iodonium tosylate (**12**).

*p*-TsOH·H<sub>2</sub>O (0.12 g, 0.6 mmol), was added to a suspension of **D** (0.26 g, 0.6 mmol) in MeCN (3 mL). A bright yellow solution developed instantly. Anisole (0.21 g, 2.0 mmol) in CHCl<sub>3</sub> (20 mL) was added and the reaction mixture was refluxed for 4 h. Consumption of in situ generated 4-[hydroxy(tosyloxy)iodo]biphenyl was monitored with KI starch paper. The reaction mixture was cooled to rt and concentrated under reduced pressure. The residual yellow oil was triturated with Et<sub>2</sub>O and the solid filtered off, washed with Et<sub>2</sub>O (20 mL x 3), and dried *in vacuo* for 6 h to give **12** as a white solid (0.19 g, 56%); mp 178–181 °C; <sup>1</sup>H-NMR (MeOD-*d*<sub>4</sub>) δ 8.17 (2 H d, *J* = 8.4 Hz, ArH), 8.11 (2 H d, *J* = 9.2 Hz, ArH), 7.74 (2 H, d, *J* = 8.4 Hz, ArH), 7.69 (2 H, d, *J* = 8.0 Hz, ArH), 7.62 (2 H, d, *J* = 7.2 Hz, ArH), 7.49–7.41 (3 H, m, ArH), 7.21 (2 H, d, *J* = 7.6 Hz, ArH), 7.06 (2 H, d, *J* = 8.8 Hz, ArH), 3.85 (3 H, s, OMe), 2.35 (3 H, s, Me); <sup>13</sup>C-NMR (MeOD-*d*<sub>4</sub>) δ 164.6, 146.7, 143.6, 141.7, 140.0, 138.6, 136.5, 131.4, 130.2, 129.9, 128.3, 127.0, 118.9, 114.8, 104.7, 56.4, 21.3; HRMS [M–OTs]<sup>+</sup> Calc'd. for C<sub>19</sub>H<sub>16</sub>OI: 387.0246, Found: 387.0236.

#### 4.7 (4-Fluorophenyl)(4'-methoxyphenyl)iodonium tosylate (**14**).

Anisole (0.86 g, 8 mmol) was added to a suspension of **C** (0.67 g, 1.6 mmol) in CHCl<sub>3</sub> (20 mL) and mixture was refluxed for 2 h. Solvent was removed under reduced pressure and the crude oil was triturated with Et<sub>2</sub>O (20 mL). The resultant solid was filtered off, washed

with Et<sub>2</sub>O (20 mL × 2), and dried *in vacuo* for 4 h to give **14** as a white solid (0.55 g, 68%); mp 138–140 °C; <sup>1</sup>H-NMR (CDCl<sub>3</sub>) δ 8.01–7.93 (2 H, m), 7.90 (2 H, d, *J* = 8.8 Hz, ArH), 7.39 (2 H, d, *J* = 7.6 Hz, ArH), 6.98 (2 H, d, *J* = 7.6 Hz, ArH), 6.93 (2 H, t, *J* = 8.8 Hz, ArH), 6.77 (2 H, d, *J* = 8.8 Hz, ArH), 3.76 (3 H, s, OMe), 2.30 (3 H, s, Me); <sup>13</sup>C-NMR (CDCl<sub>3</sub>) δ 165.1, 163.0, 162.2, 142.4, 139.5, 128.5, 125.9, 118.7 (d, *J*<sub>C-F</sub> = 24.1 Hz), 117.3, 109.7, 104.7, 55.5, 21.2; <sup>19</sup>F-NMR (decoupled, CDCl<sub>3</sub>) δ -107.0; HRMS [M-OTs]<sup>+</sup> Calc'd. for C<sub>13</sub>H<sub>11</sub>OIF: 328.9839, Found: 328.9839.

#### 4.8 Bis(4-methoxyphenyl)iodonium tosylate (**15**).

*m*-CPBA (0.74 g, 3.3 mmol, 77% max. content) was added to a solution of 4-iodoanisole (0.33 g, 3.0 mmol) in CHCl<sub>3</sub> (30 mL). *p*-TsOH·H<sub>2</sub>O (0.63 g, 3.3 mmol) was added to the pale yellow solution, followed by anisole (1.62 g, 15 mmol). The resultant mixture was heated to 40 °C and held at this temperature for 4 h. Solvent was removed *in vacuo* and the resultant yellow oil was triturated with Et<sub>2</sub>O. The obtained solid was washed with Et<sub>2</sub>O and recrystallized from MeOH-Et<sub>2</sub>O to give **15** as a white solid (1.14 g, 74%). mp 158–160 °C; <sup>1</sup>H-NMR (CDCl<sub>3</sub>) δ 7.86 (4 H, d, *J* = 8.8 Hz, ArH), 7.51 (2 H, d, *J* = 8 Hz, ArH), 7.01 (2 H, d, *J* = 8 Hz, ArH), 6.79 (4 H, d, *J* = 9.2 Hz, ArH), 3.76 (6 H, s, OMe), 2.30 (3 H, s, Me); <sup>13</sup>C-NMR (CDCl<sub>3</sub>) δ 162.4, 143.2, 139.4, 137.1, 128.6, 126.2, 117.5, 104.7, 55.8, 21.4. HRMS [M-OTs]<sup>+</sup> Calc'd. for C<sub>14</sub>H<sub>14</sub>O<sub>2</sub>I: 341.0039, Found: 325.0038

## References

- 1 J.-H. Chun, S. Lu, Y.-S. Lee and V. W. Pike, *J. Org. Chem.*, 2010, **75**, 3332–3338.
- 2 J.-H. Chun and V. W. Pike, *J. Org. Chem.*, 2012, **77**, 1931–1938.
- 3 J.-H. Chun, S. Lu and V. W. Pike, *Eur. J. Org. Chem.*, 2011, 4439–4447.

**Appendix 1.**  $^1\text{H}$  (400 MHz),  $^{13}\text{C}$  (100 MHz) and  $^{19}\text{F}$  (376 MHz) NMR spectra of diaryliodonium tosylates

1.1 Compound 4

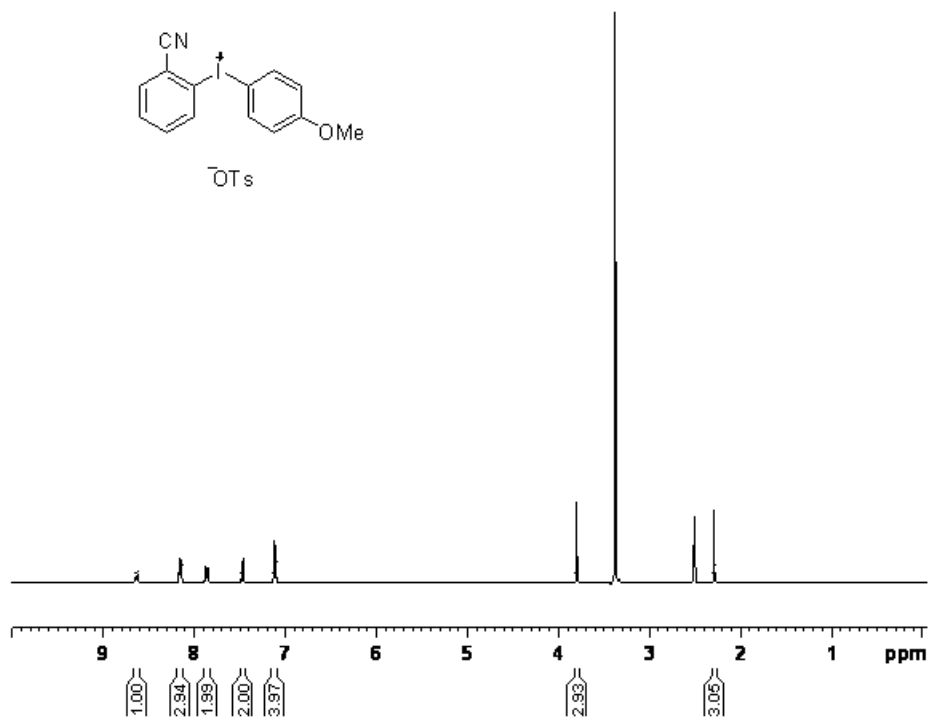

ST-5-66 C13CPD DMSO

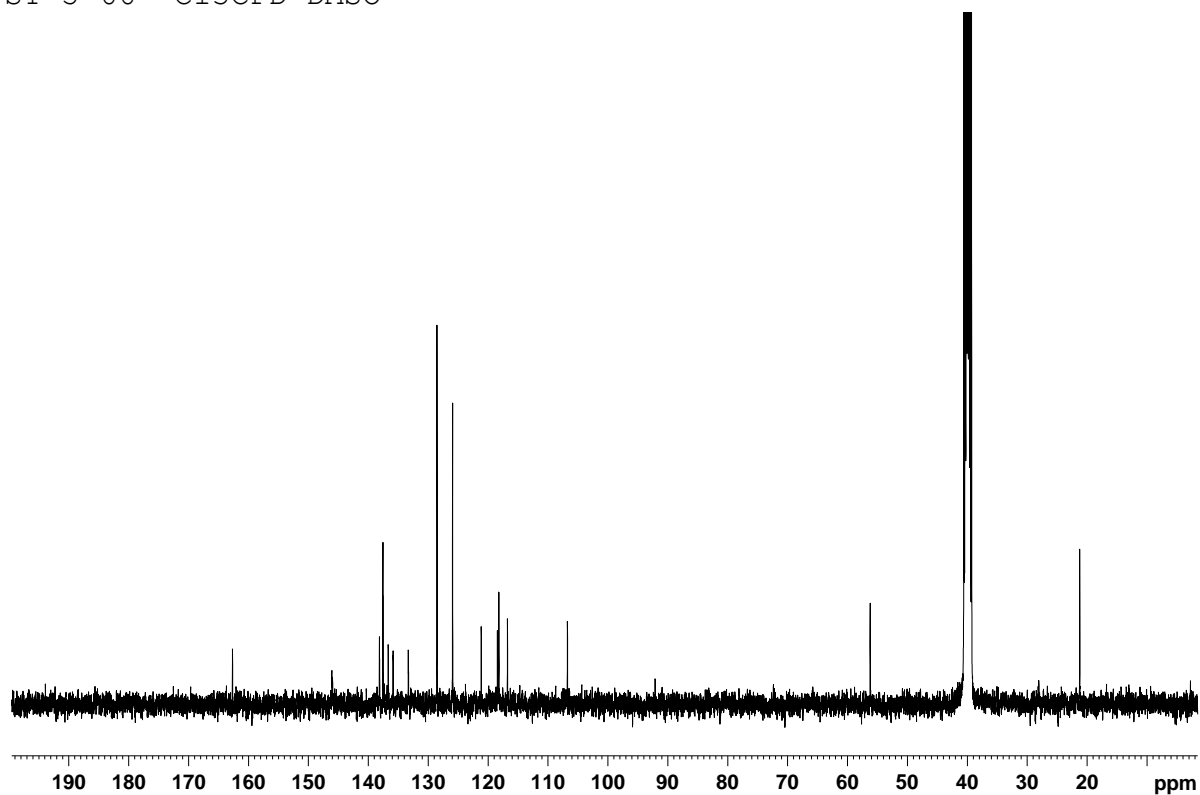

## 1.2 Compound 5

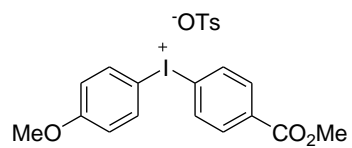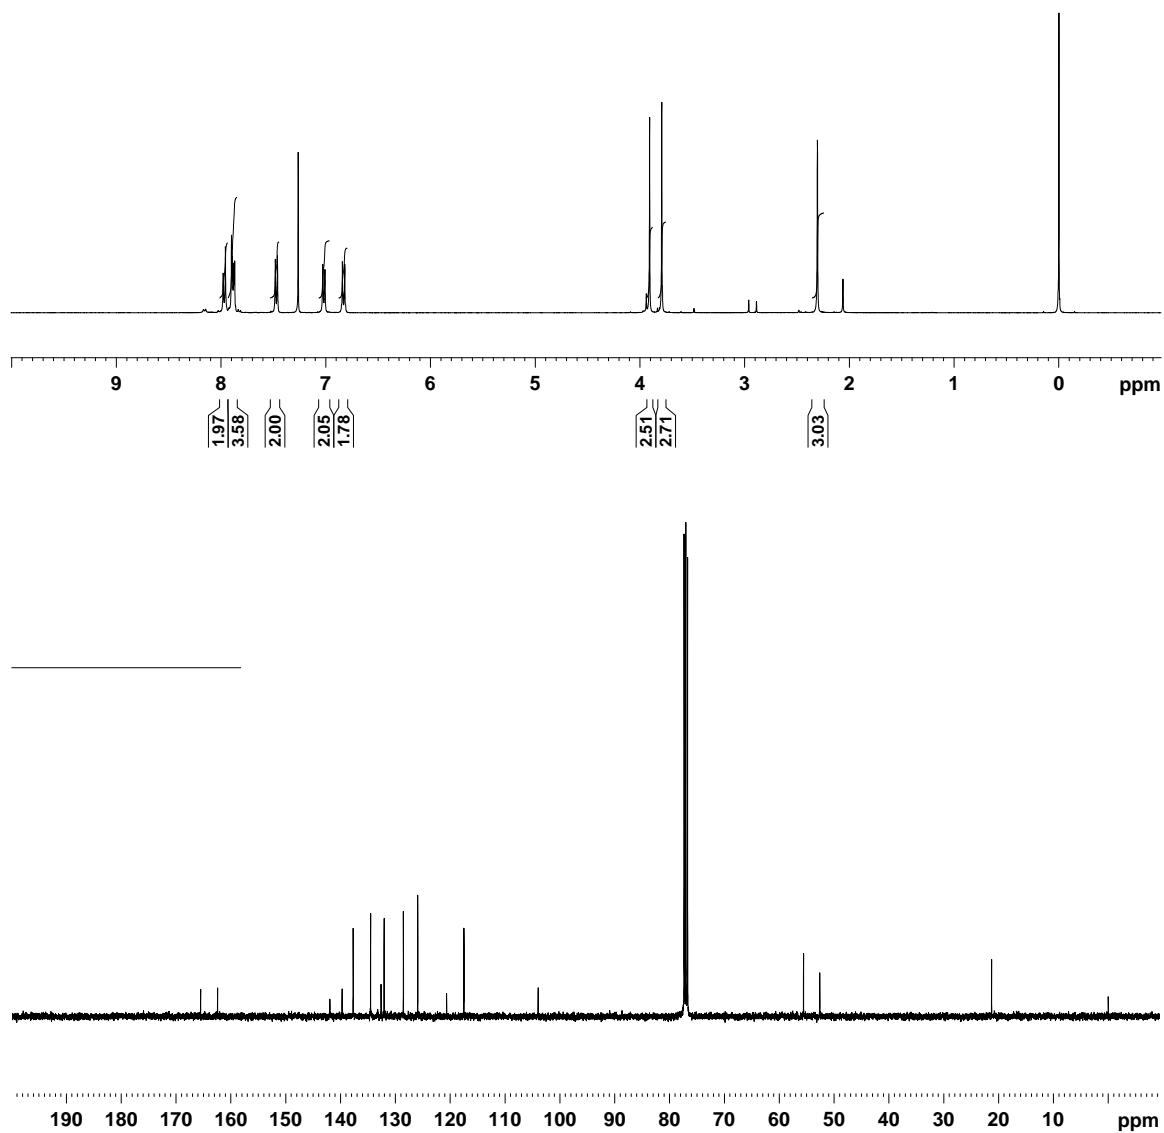

1.3 Compound 6

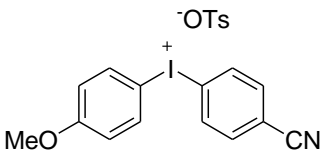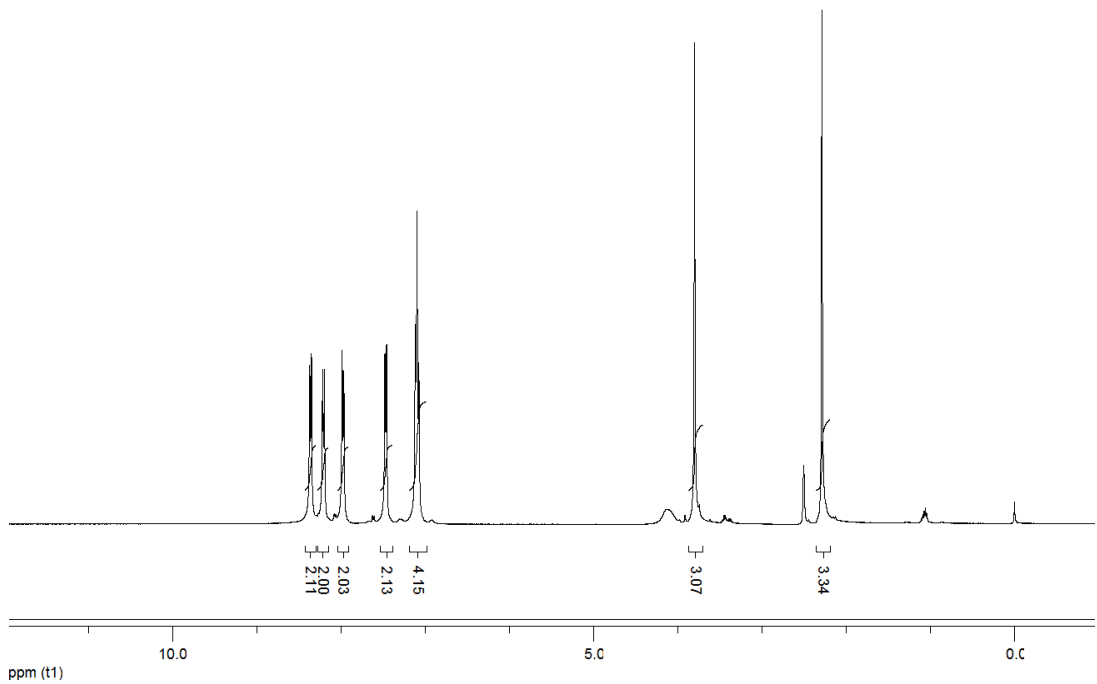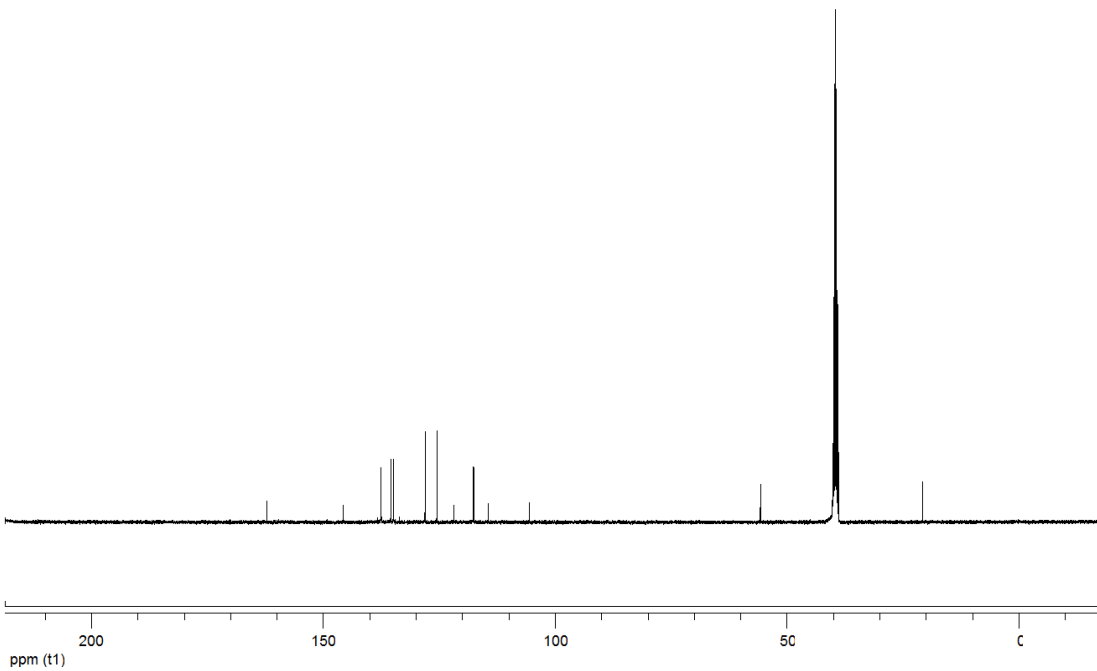

# 1.4 Compound 7

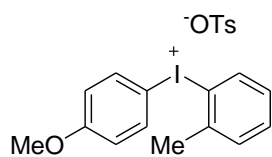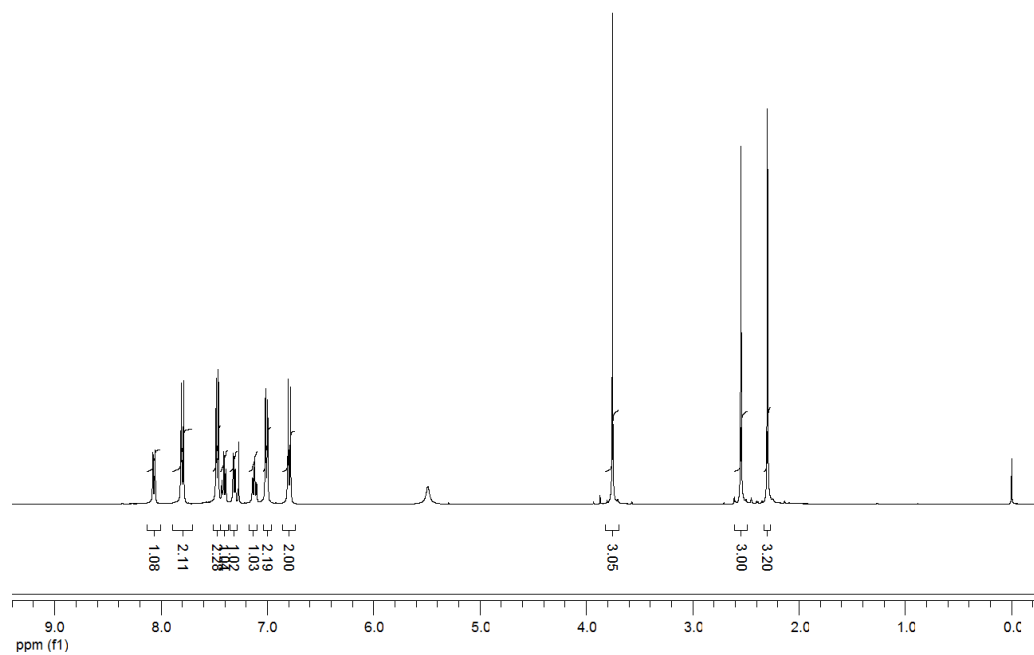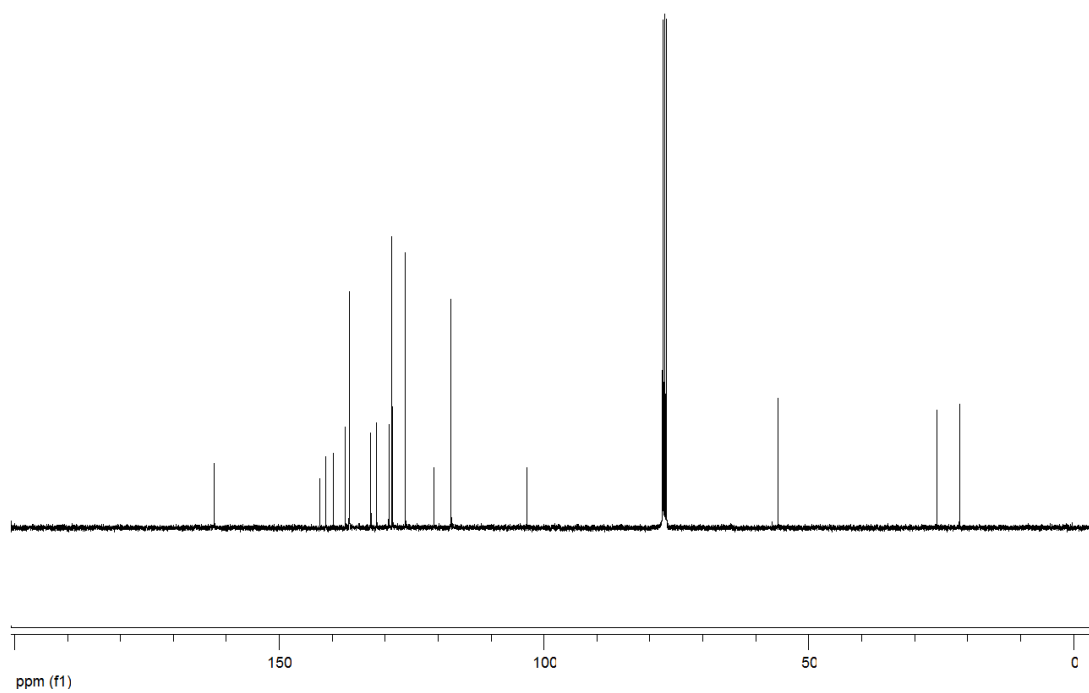

1.5 Compound **8**

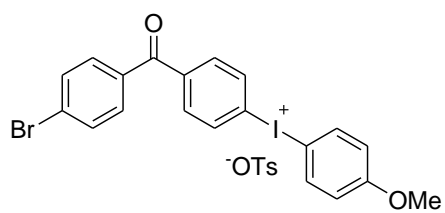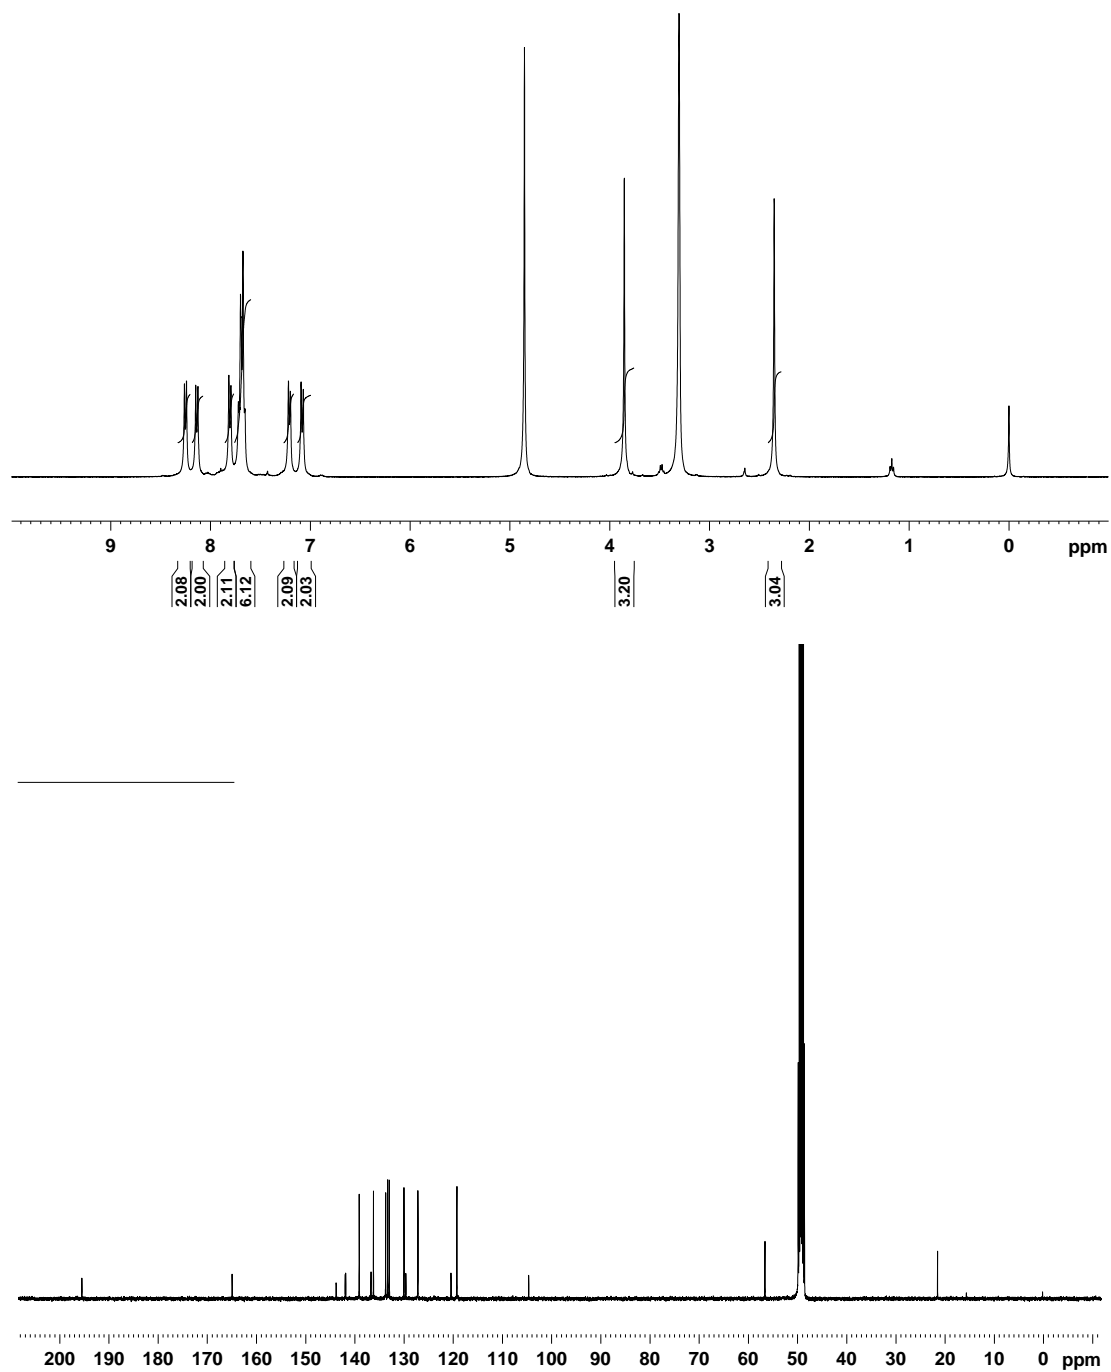

1.6 Compound **12**

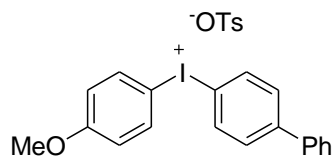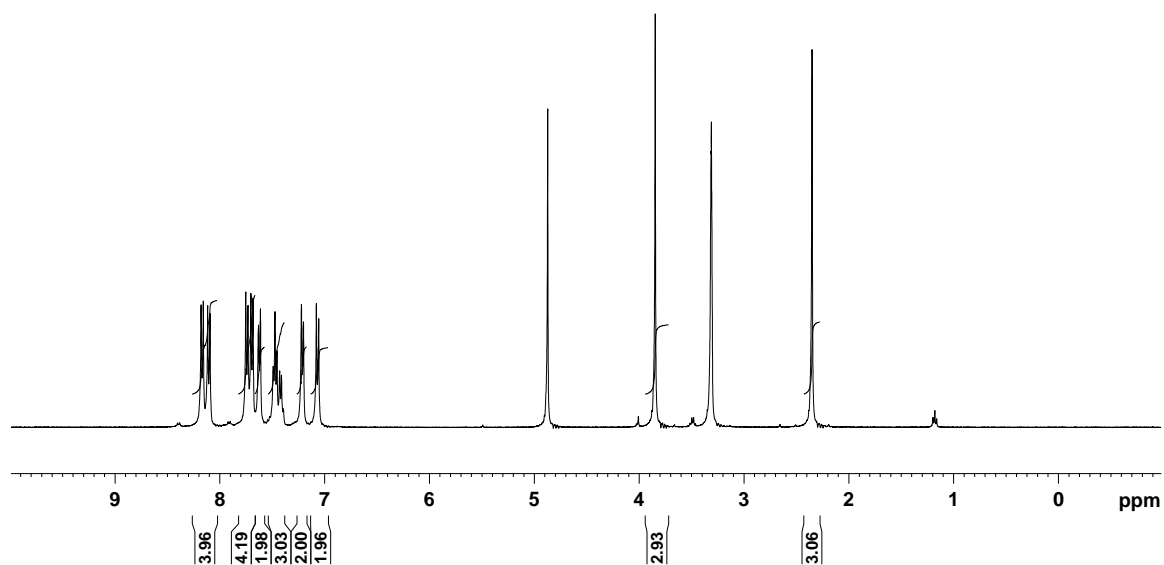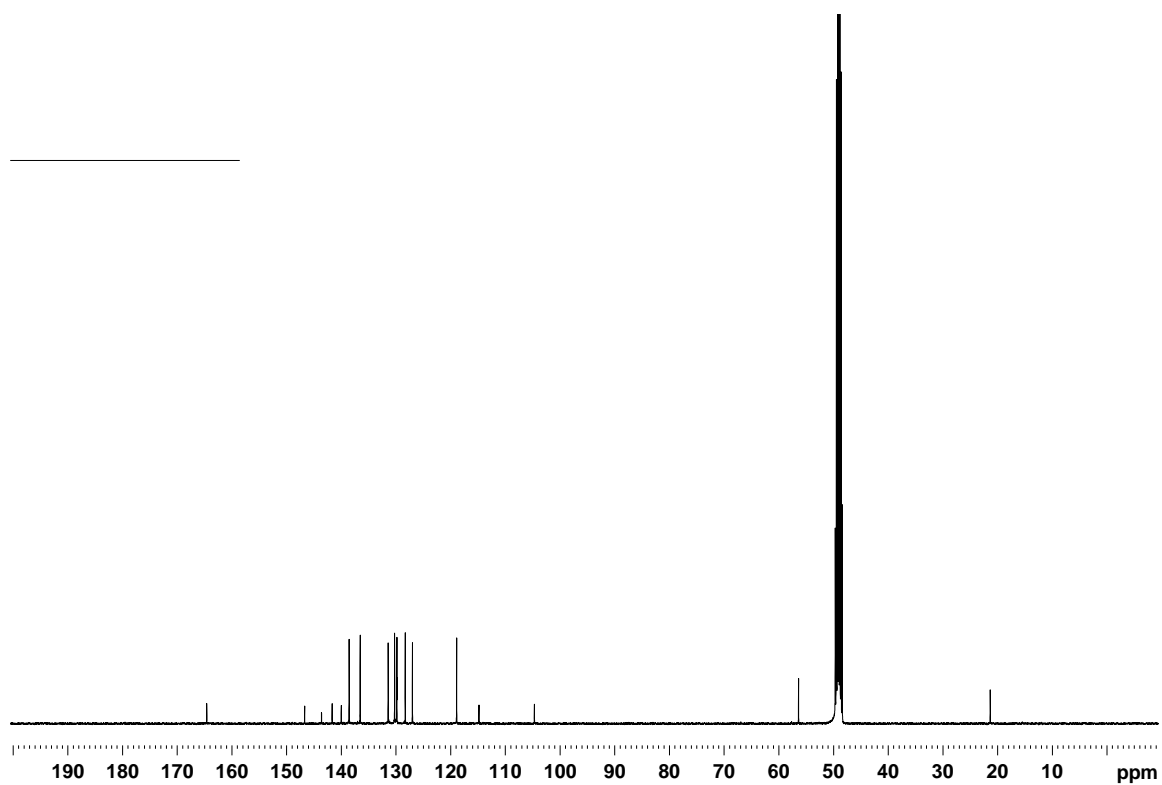

1.7 Compound **14**

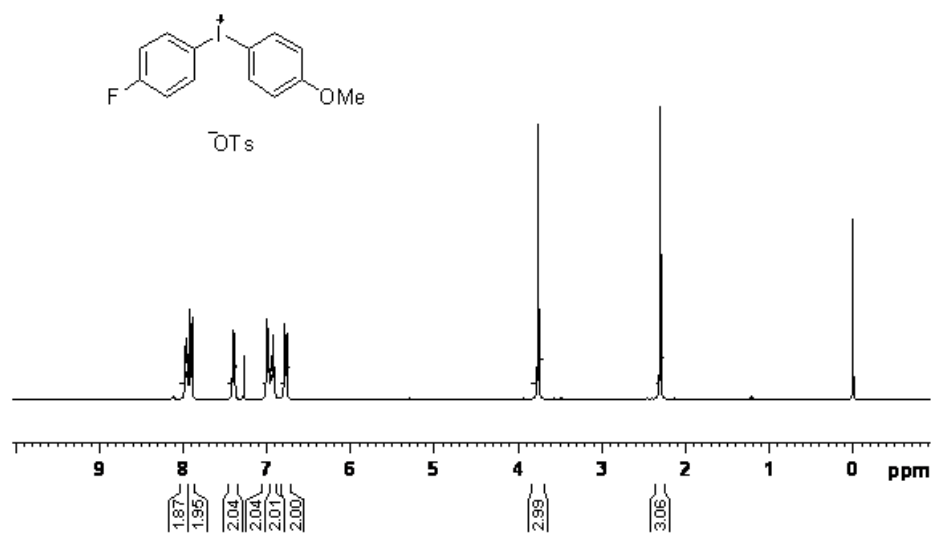

JC0596 C13CPD CDC13

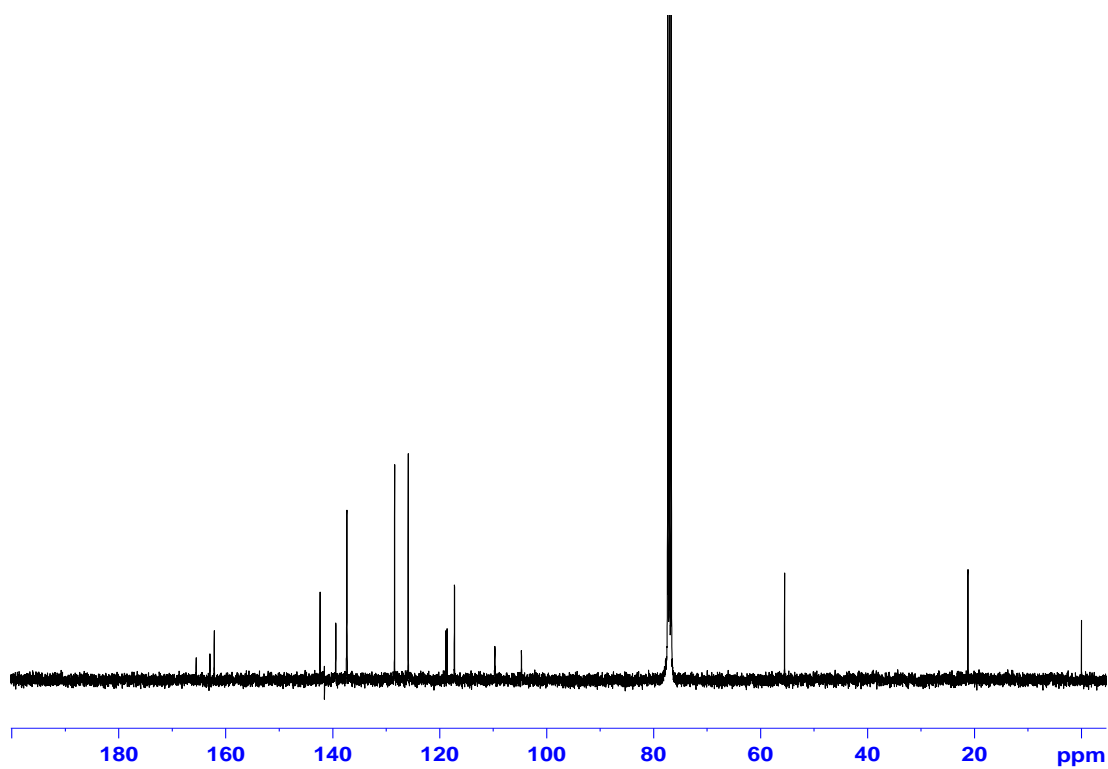

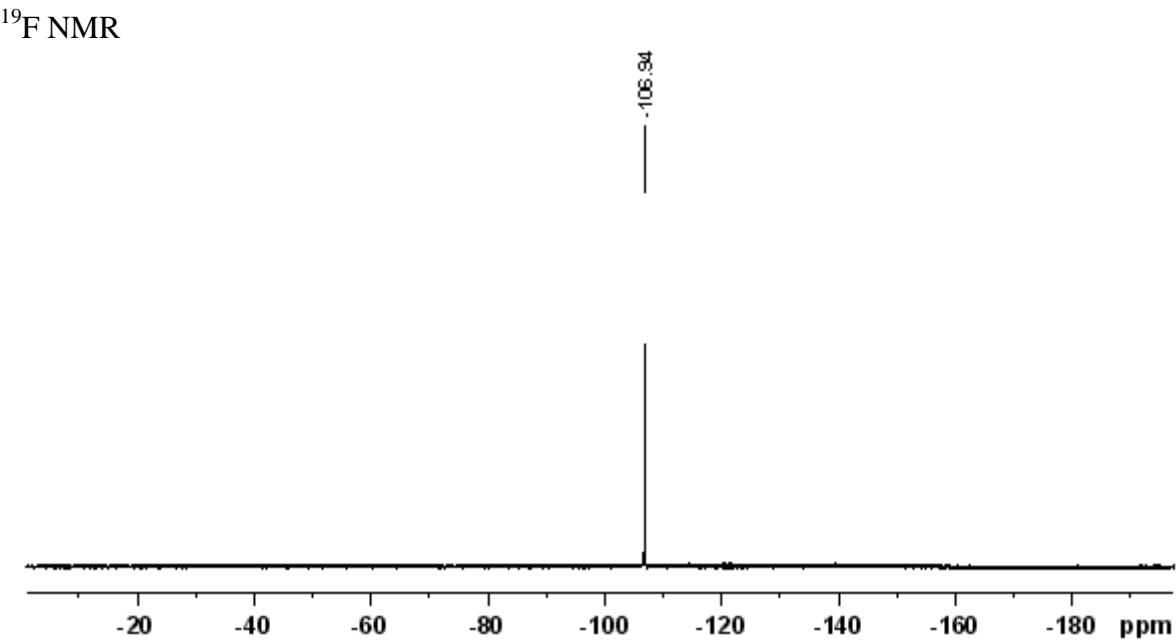

# 1.8 Compound **15**

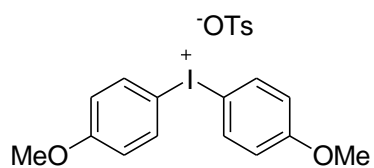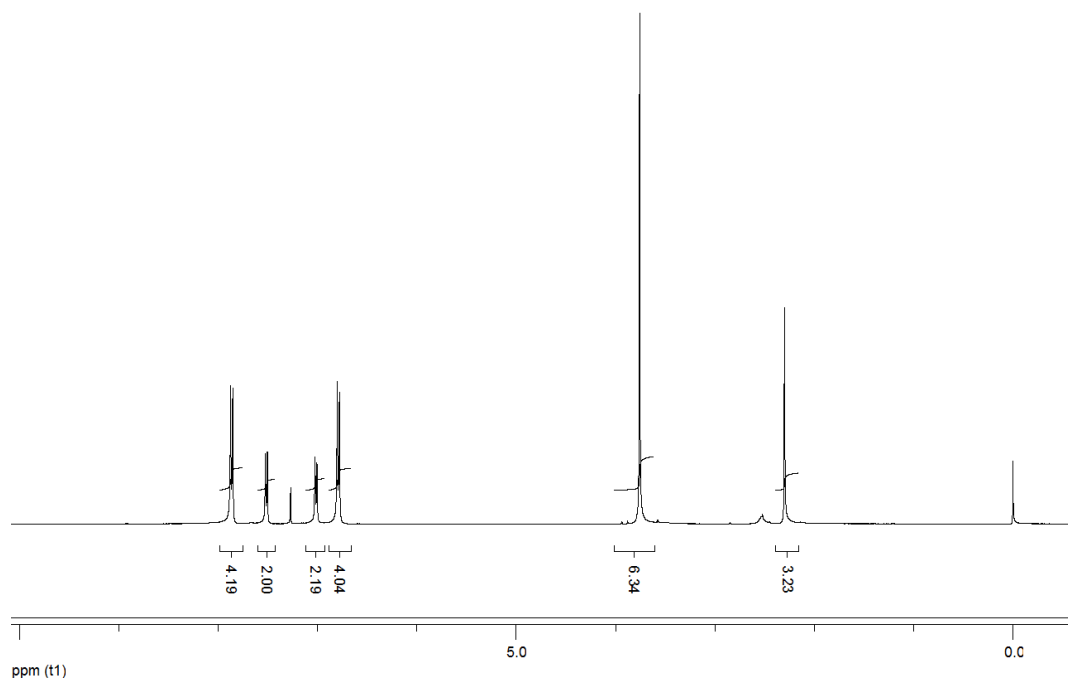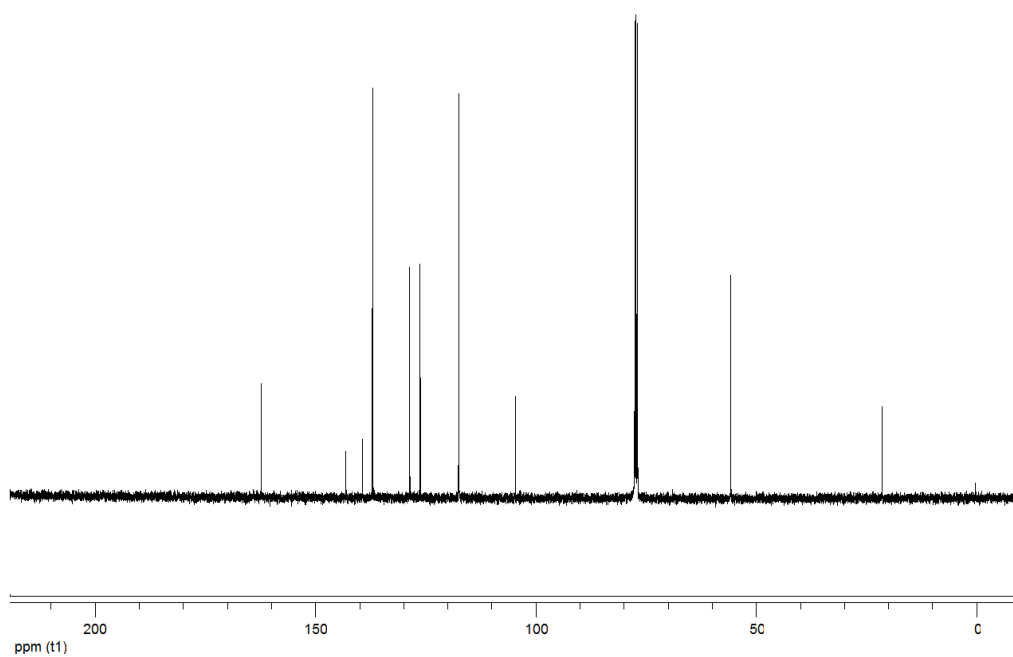

## Appendix 2. Selected radio-HPLC chromatograms

(Volts represent output of radioactivity detector, and this is proportional to radioactivity detected)

### 2.1 Example of high yield radiofluorination of **5** in micro-reactor

(A) in DMF-0.25% H<sub>2</sub>O containing K 2.2.2-K<sub>2</sub>CO<sub>3</sub> at 150 °C

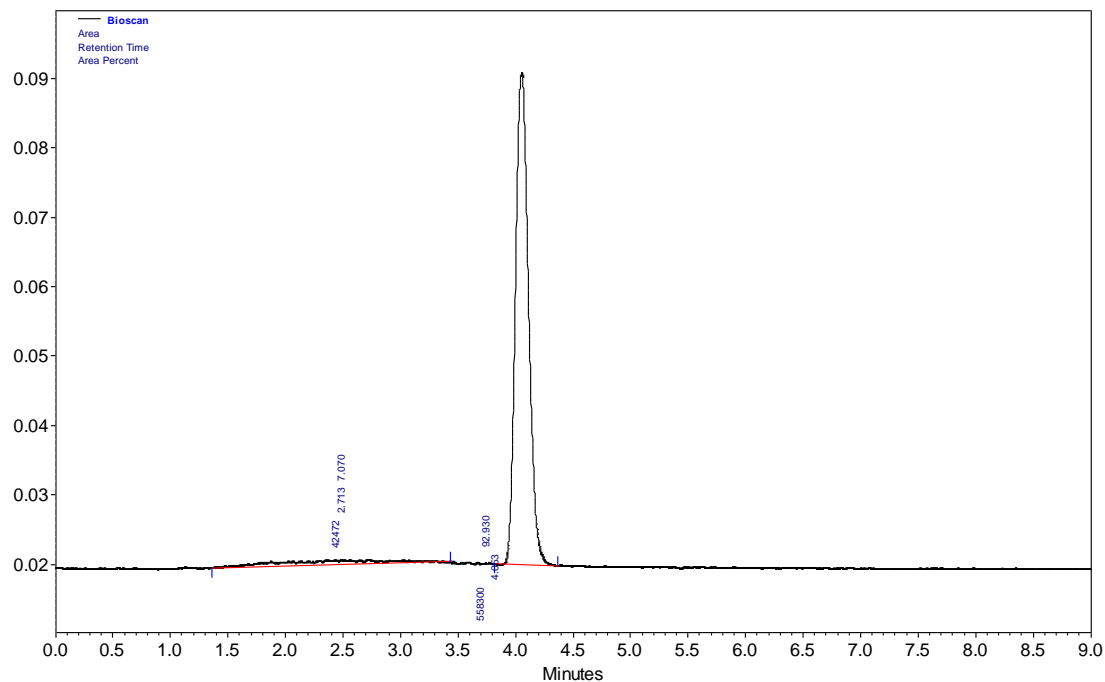

(B) in DMF-28% H<sub>2</sub>O containing K<sub>2</sub>CO<sub>3</sub> only and at different temperatures

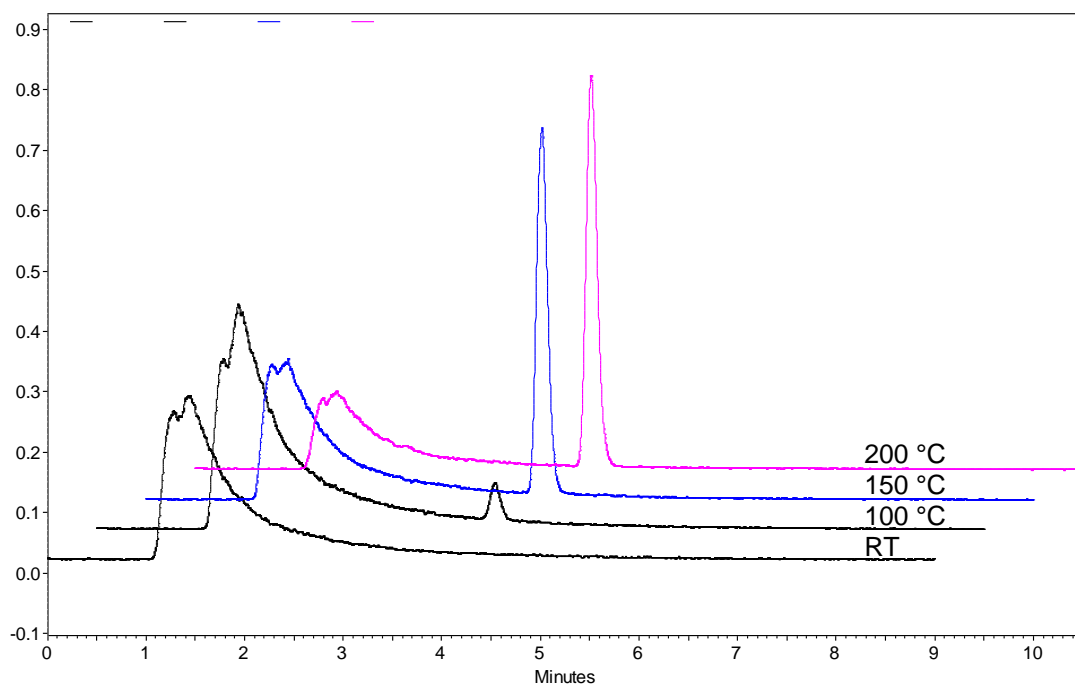

## 2.2 Example of low yield radiofluorination of **10** in micro-reactor

(A) in DMF-0.25% H<sub>2</sub>O containing K 2.2.2-K<sub>2</sub>CO<sub>3</sub> at 150 °C

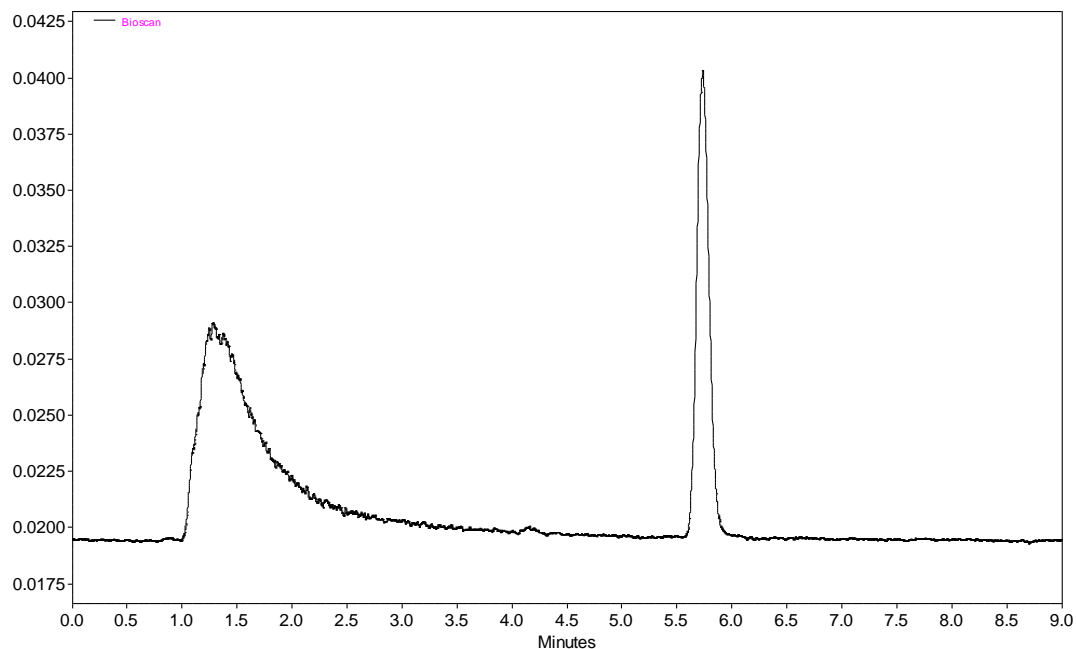

(B) in DMF-28% H<sub>2</sub>O containing K<sub>2</sub>CO<sub>3</sub> only and at different temperatures

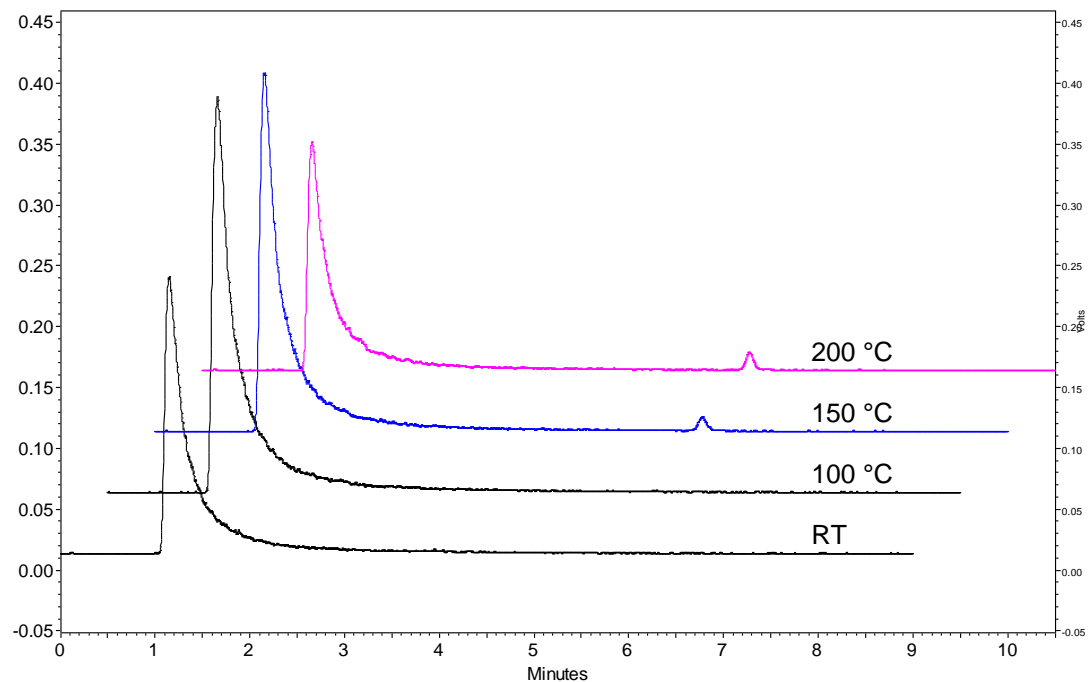

### Appendix 3. Configuration of the microfluidic apparatus

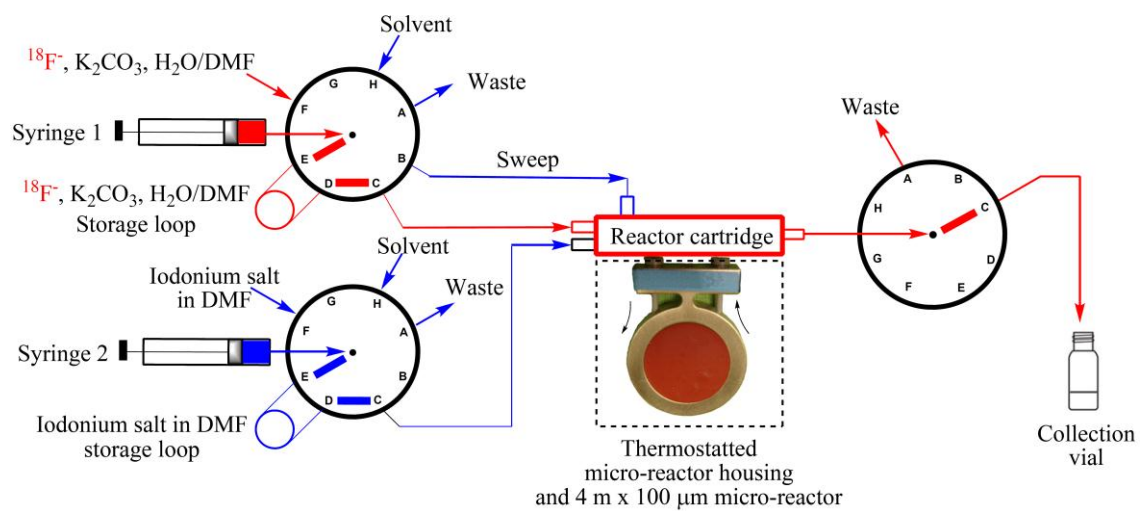

Supplement: c3ob40742j.pdf [file c3ob40742j.pdf]
